# Supplementary material for: cPLA2 activation contributes to lysosomal defects leading to impairment of autophagy after spinal cord injury
Source: PubMed Central journal article supplement (PMC6624263; doi:10.1038/s41419-019-1764-1), 2019-07-11
Supplement: 41419_2019_1764_MOESM2_ESM.pdf [file 41419_2019_1764_MOESM2_ESM.pdf]

**a**

# Lipidomic workflow

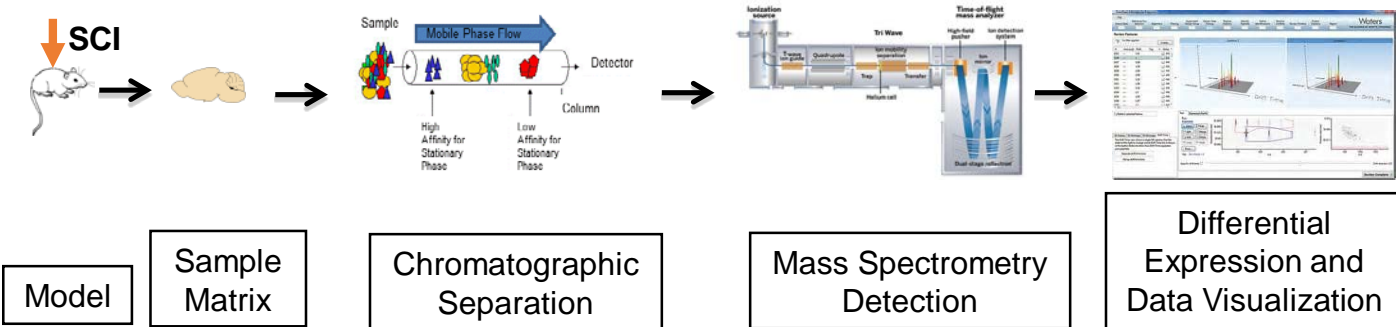**b**

## Phospholipids: PC, PE, PS, PG, SM

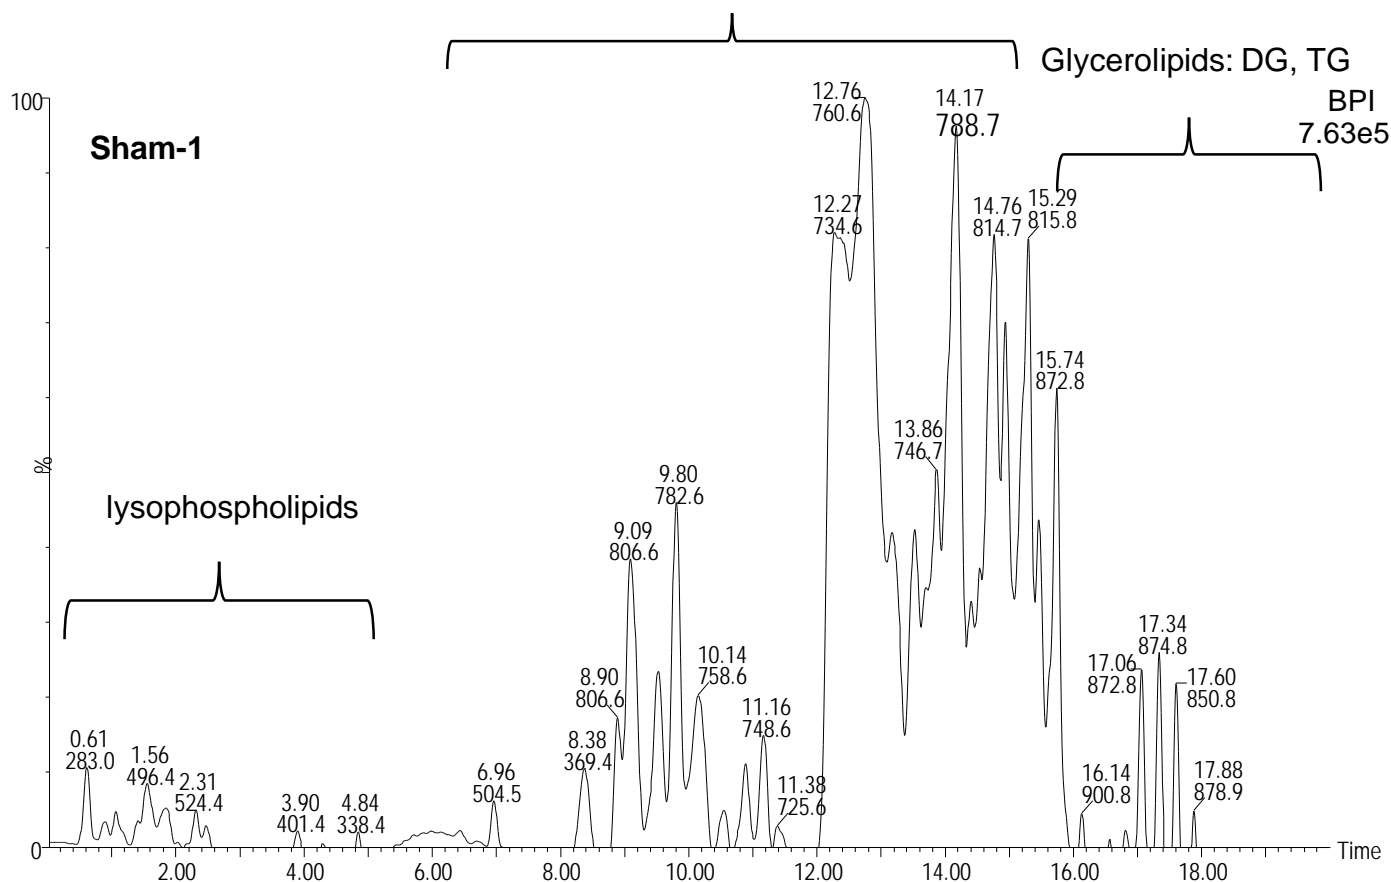

**Supplementary Figure S1.** Lipidomic analysis of lysosomal membranes by LC-MS. Related to Figure 3. **(a)** Lipidomics workflow representing how samples were collected, processed and analyzed to obtain lipid profiles of lysosomal membranes. **(b)** Example UPLC-HDMSE data for identification of LPC (18:0). Base peak ion chromatogram for entire chromatographic run (20 minutes), extracted ion chromatogram for  $m/z$  524.3710, higher-collision energy mass spectrum for  $m/z$  524.3710, and proposed structure for  $m/z$  524.3710 are shown. Identification is based on chromatographic retention, accurate mass precursor ion, and ion mobility aligned tandem mass spectrometry.
