# Supplementary material for: cPLA2 activation contributes to lysosomal defects leading to impairment of autophagy after spinal cord injury
Source: PubMed Central journal article supplement (PMC6624263; doi:10.1038/s41419-019-1764-1), 2019-07-11
Supplement: 41419_2019_1764_MOESM3_ESM.pdf [file 41419_2019_1764_MOESM3_ESM.pdf]

**Table S1.** List comparing identified lipids differentially expressed between Sham and SCI (87 lipids)

|    | Input Mass | Matched Mass | Delta  | Name                  | Anova (p) | q Value | FC   | Highest Mean | Max Abun |
|----|------------|--------------|--------|-----------------------|-----------|---------|------|--------------|----------|
| 1  | 281.2492   | 281.2486     | 0.0006 | FA(18:1)              | 0.0102    | 0.0610  | 1.2  | SCI          | 5997.5   |
| 2  | 309.2810   | 309.2799     | 0.0011 | FA(20:1)              | 0.0090    | 0.0587  | 1.5  | SCI          | 109.2    |
| 3  | 337.3117   | 337.3112     | 0.0005 | FA(22:1)              | 0.0092    | 0.0587  | 1.5  | SCI          | 39.8     |
| 4  | 365.3432   | 365.3425     | 0.0007 | FA(24:1)              | 0.0490    | 0.1205  | 1.8  | SCI          | 28.4     |
| 5  | 520.5090   | 520.5088     | 0.0002 | Cer(d34:1)            | 0.0395    | 0.1661  | 1.3  | SCI          | 2658.2   |
| 6  | 644.5993   | 644.5952     | 0.0041 | Cer(d40:1)            | 0.0240    | 0.1461  | 2.8  | SCI          | 947.1    |
| 7  | 672.6250   | 672.6265     | 0.0015 | Cer(d42:1)            | 0.0247    | 0.1468  | 3.4  | SCI          | 876.9    |
| 8  | 806.6507   | 806.6480     | 0.0027 | HexCer(d40:1)         | 0.0277    | 0.1486  | 2.3  | SCI          | 140898.6 |
| 9  | 834.6792   | 834.6793     | 0.0001 | HexCer(d42:1)         | 0.0316    | 0.1526  | 2.9  | SCI          | 348944.8 |
| 10 | 822.7249   | 822.7181     | 0.0068 | HexCer(d44:1)         | 0.0278    | 0.1489  | 2.5  | SCI          | 102.2    |
| 11 | 860.5953   | 860.5927     | 0.0026 | SHexCer(d40:2)        | 0.0074    | 0.0552  | 1.2  | SCI          | 2844.4   |
| 12 | 888.6258   | 888.6240     | 0.0018 | SHexCer(d42:2)        | 0.0258    | 0.0911  | 1.1  | SCI          | 102981.7 |
| 13 | 733.6205   | 733.6218     | 0.0013 | SM(d36:0)             | 0.0112    | 0.1197  | 1.1  | SCI          | 44039.1  |
| 14 | 761.6509   | 761.6531     | 0.0022 | SM(d38:0)             | 0.0218    | 0.1424  | 1.4  | SCI          | 56683.1  |
| 15 | 817.7077   | 817.7157     | 0.0080 | SM(d42:0)             | 0.0424    | 0.1686  | 2.5  | SCI          | 4320.8   |
| 16 | 815.6982   | 815.7000     | 0.0018 | SM(d42:1)             | 0.0461    | 0.1722  | 2.0  | SCI          | 148720.5 |
| 17 | 857.6778   | 857.6753     | 0.0025 | SM(d42:2)             | 0.0314    | 0.0990  | 1.2  | SCI          | 13973.4  |
| 18 | 496.3397   | 496.3398     | 0.0001 | LPC(16:0)             | 0.0015    | 0.0798  | 1.4  | SCI          | 34422.2  |
| 19 | 494.3229   | 494.3241     | 0.0012 | LPC(16:1)             | 0.0457    | 0.1722  | 1.6  | SCI          | 320.5    |
| 20 | 524.3674   | 524.3711     | 0.0037 | LPC(18:0)             | 0.0029    | 0.0981  | 1.5  | SCI          | 25188.2  |
| 21 | 520.3368   | 520.3398     | 0.0030 | LPC(18:2)             | 0.0019    | 0.0843  | 2.0  | SCI          | 865.1    |
| 22 | 550.3864   | 550.3867     | 0.0003 | LPC(20:1)             | 0.0246    | 0.1468  | 1.3  | SCI          | 4135.2   |
| 23 | 572.3679   | 572.3711     | 0.0032 | LPC(22:4)             | 0.0207    | 0.1408  | 1.6  | SCI          | 343.0    |
| 24 | 482.3600   | 482.3605     | 0.0005 | LPC(O-16:0)           | 0.0059    | 0.1051  | 1.5  | SCI          | 314.7    |
| 25 | 480.3436   | 480.3448     | 0.0012 | LPC(P-16:0)           | 0.0264    | 0.1474  | 1.6  | SCI          | 473.4    |
| 26 | 508.3756   | 508.3761     | 0.0005 | LPC(P-18:0)           | 0.0330    | 0.1545  | 1.8  | SCI          | 240.2    |
| 27 | 758.5694   | 758.5694     | 0.0000 | PC(34:2)              | 0.0310    | 0.1519  | 1.1  | SCI          | 29952.8  |
| 28 | 756.5494   | 756.5538     | 0.0044 | PC(34:3)              | 0.0238    | 0.1461  | 1.3  | Sham         | 79917.3  |
| 29 | 754.5350   | 754.5381     | 0.0031 | PC(34:4)              | 0.0058    | 0.1045  | 1.5  | Sham         | 4444.9   |
| 30 | 782.5648   | 782.5694     | 0.0046 | PC(36:4)              | 0.0335    | 0.1554  | 2.0  | Sham         | 956.2    |
| 31 | 810.5991   | 810.6007     | 0.0016 | PC(38:4)              | 0.0273    | 0.1482  | 1.3  | Sham         | 50851.8  |
| 32 | 804.5503   | 804.5538     | 0.0035 | PC(38:7)              | 0.0089    | 0.1126  | 1.9  | SCI          | 565.0    |
| 33 | 838.6275   | 838.6320     | 0.0045 | PC(40:4)              | 0.0325    | 0.1535  | 2.0  | SCI          | 4922.6   |
| 34 | 834.5969   | 834.6007     | 0.0038 | PC(40:6)              | 0.0198    | 0.1408  | 1.7  | Sham         | 377.8    |
| 35 | 830.5633   | 830.5694     | 0.0061 | PC(40:8)              | 0.0043    | 0.0995  | 1.8  | Sham         | 430.1    |
| 36 | 828.5515   | 828.5538     | 0.0023 | PC(40:9)              | 0.0049    | 0.1006  | 2.1  | Sham         | 195.9    |
| 37 | 866.6590   | 866.6633     | 0.0043 | PC(42:4)              | 0.0014    | 0.0786  | 1.2  | Sham         | 28364.0  |
| 38 | 864.6439   | 864.6477     | 0.0038 | PC(42:5)              | 0.0143    | 0.1323  | 1.3  | Sham         | 9058.4   |
| 39 | 862.6228   | 862.6320     | 0.0092 | PC(42:6)              | 0.0154    | 0.1345  | 1.5  | Sham         | 565.3    |
| 40 | 856.5775   | 856.5851     | 0.0076 | PC(42:9)              | 0.0425    | 0.1689  | 2.0  | Sham         | 149.6    |
| 41 | 892.6744   | 892.6790     | 0.0046 | PC(44:5)              | 0.0061    | 0.1055  | 1.1  | Sham         | 13502.5  |
| 42 | 746.5995   | 746.6058     | 0.0063 | PC(O-34:1)/PC(P-34:0) | 0.0450    | 0.1722  | 1.1  | Sham         | 63919.3  |
| 43 | 772.6163   | 772.6215     | 0.0052 | PC(O-36:2)/PC(P-36:1) | 0.0099    | 0.1126  | 1.7  | SCI          | 46.6     |
| 44 | 770.6050   | 770.6058     | 0.0008 | PC(O-36:3)/PC(P-36:2) | 0.0407    | 0.1668  | 1.2  | SCI          | 9015.5   |
| 45 | 798.6301   | 798.6371     | 0.0070 | PC(O-38:3)/PC(P-38:2) | 0.0142    | 0.1321  | 4.2  | SCI          | 38.6     |
| 46 | 796.6159   | 796.6215     | 0.0056 | PC(O-38:4)/PC(P-38:3) | 0.0402    | 0.1661  | 2.1  | SCI          | 147.9    |
| 47 | 830.6920   | 830.6997     | 0.0077 | PC(O-40:1)/PC(P-40:0) | 0.0237    | 0.1460  | 2.0  | SCI          | 4990.7   |
| 48 | 826.6640   | 826.6684     | 0.0044 | PC(O-40:3)/PC(P-40:2) | 0.0407    | 0.1668  | 1.5  | SCI          | 3009.4   |
| 49 | 820.6144   | 820.6215     | 0.0071 | PC(O-40:6)/PC(P-40:5) | 0.0383    | 0.1653  | 1.5  | SCI          | 5435.9   |
| 50 | 848.6518   | 848.6528     | 0.0010 | PC(O-42:6)/PC(P-42:5) | 0.0324    | 0.1532  | 2.2  | SCI          | 20303.6  |
| 51 | 452.2794   | 452.2783     | 0.0011 | LPE(16:0)             | 0.0019    | 0.0328  | 1.6  | SCI          | 3539.8   |
| 52 | 450.2625   | 450.2626     | 0.0001 | LPE(16:1)             | 0.0081    | 0.0558  | 5.1  | SCI          | 57.0     |
| 53 | 478.2956   | 478.2939     | 0.0017 | LPE(18:1)             | 0.0239    | 0.0886  | 1.4  | SCI          | 28995.9  |
| 54 | 476.2781   | 476.2783     | 0.0002 | LPE(18:2)             | 0.0370    | 0.1049  | 3.5  | SCI          | 27.9     |
| 55 | 500.2796   | 500.2783     | 0.0013 | LPE(20:4)             | 0.0301    | 0.0979  | 1.9  | SCI          | 1607.7   |
| 56 | 528.3104   | 528.3096     | 0.0008 | LPE(22:4)             | 0.0196    | 0.0821  | 1.7  | SCI          | 1984.9   |
| 57 | 468.3443   | 468.3448     | 0.0005 | LPE(O-18:0)           | 0.0312    | 0.1520  | 1.3  | SCI          | 98.7     |
| 58 | 466.3280   | 466.3292     | 0.0012 | LPE(P-18:0)           | 0.0355    | 0.1595  | 2.4  | SCI          | 48.6     |
| 59 | 708.4503   | 708.4599     | 0.0096 | PE(34:6)              | 0.0359    | 0.1602  | 4.5  | SCI          | 3704.4   |
| 60 | 742.5417   | 742.5392     | 0.0025 | PE(36:2)              | 0.0461    | 0.1169  | 1.1  | SCI          | 12232.6  |
| 61 | 738.5070   | 738.5079     | 0.0009 | PE(36:4)              | 0.0465    | 0.1169  | 15.8 | SCI          | 26.0     |
| 62 | 738.5066   | 738.5068     | 0.0002 | PE(36:5)              | 0.0188    | 0.1399  | 1.6  | SCI          | 71.4     |
| 63 | 792.5521   | 792.5538     | 0.0017 | PE(40:6)              | 0.0471    | 0.1738  | 1.3  | Sham         | 168526.7 |
| 64 | 860.7170   | 860.7103     | 0.0067 | PE(44:0)              | 0.0389    | 0.1660  | 2.3  | SCI          | 8046.5   |
| 65 | 846.6078   | 846.6007     | 0.0071 | PE(44:7)              | 0.0284    | 0.1502  | 2.2  | Sham         | 81.4     |
| 66 | 730.5736   | 730.5745     | 0.0009 | PE(O-36:2)/PE(P-36:1) | 0.0078    | 0.1111  | 1.1  | Sham         | 607694.0 |
| 67 | 782.5966   | 782.6058     | 0.0092 | PE(O-40:4)/PE(P-40:3) | 0.0229    | 0.1460  | 2.7  | Sham         | 503.8    |
| 68 | 778.5762   | 778.5756     | 0.0006 | PE(O-40:5)/PE(P-40:4) | 0.0307    | 0.0983  | 1.1  | Sham         | 11210.7  |
| 69 | 778.5737   | 778.5745     | 0.0008 | PE(O-40:6)/PE(P-40:5) | 0.0201    | 0.1408  | 1.2  | Sham         | 104393.5 |
| 70 | 776.5544   | 776.5589     | 0.0045 | PE(P-40:6)            | 0.0307    | 0.1519  | 1.6  | Sham         | 904.9    |
| 71 | 773.5387   | 773.5338     | 0.0049 | PG(36:2)              | 0.0022    | 0.0346  | 1.9  | SCI          | 185.8    |
| 72 | 859.6482   | 859.6434     | 0.0048 | PG(42:1)              | 0.0210    | 0.0861  | 47.6 | SCI          | 24.5     |
| 73 | 816.5772   | 816.5760     | 0.0012 | PS(38:1)              | 0.0280    | 0.0940  | 2.3  | SCI          | 235.9    |
| 74 | 844.6100   | 844.6073     | 0.0027 | PS(40:1)              | 0.0122    | 0.0669  | 1.1  | SCI          | 44277.8  |
| 75 | 896.6331   | 896.6386     | 0.0055 | PS(44:3)              | 0.0474    | 0.1179  | 2.0  | Sham         | 66.5     |
| 76 | 641.5093   | 641.5115     | 0.0022 | DG(36:3)              | 0.0440    | 0.1710  | 3.3  | SCI          | 45.6     |
| 77 | 689.5164   | 689.5115     | 0.0049 | DG(40:7)              | 0.0298    | 0.1510  | 2.0  | Sham         | 687.2    |
| 78 | 877.6605   | 877.6680     | 0.0075 | DG(54:11)             | 0.0207    | 0.1408  | 1.7  | SCI          | 11.2     |
| 79 | 900.7440   | 900.7439     | 0.0001 | DG(56:11)             | 0.0308    | 0.1519  | 1.5  | SCI          | 75.1     |
| 80 | 789.5974   | 789.6004     | 0.0030 | TG(46:6)              | 0.0213    | 0.1412  | 1.4  | Sham         | 2940.3   |
| 81 | 787.5936   | 787.5847     | 0.0089 | TG(46:7)              | 0.0239    | 0.1461  | 1.5  | Sham         | 16806.5  |
| 82 | 868.7324   | 868.7389     | 0.0065 | TG(52:6)              | 0.0268    | 0.1478  | 1.4  | SCI          | 442149.0 |
| 83 | 977.7547   | 977.7569     | 0.0022 | TG(60:10)             | 0.0320    | 0.1526  | 1.5  | SCI          | 478.0    |
| 84 | 1052.8705  | 1052.8641    | 0.0064 | TG(66:12)             | 0.0018    | 0.0836  | 2.0  | SCI          | 5000.0   |
| 85 | 1089.8781  | 1089.8821    | 0.0040 | TG(68:10)             | 0.0293    | 0.1505  | 5.9  | SCI          | 44.6     |
| 86 | 1080.8993  | 1080.8954    | 0.0039 | TG(68:12)             | 0.0010    | 0.0761  | 2.7  | SCI          | 676.4    |
| 87 | 1078.8838  | 1078.8797    | 0.0041 | TG(68:13)             | 0.0013    | 0.0782  | 2.5  | SCI          | 264.2    |

**Supplementary Table S1.** There was a total of 87 lipids identified. Identification was based on UPLC HDMS<sup>E</sup> as described previously<sup>25</sup>. Delta refers to mass accuracy in ppm (parts per million). FA = fatty acyl, Cer = ceramide, HexCer = hexosylceramide, SM = sphingomyelin, LPC = lysophosphatidylcholine, PC = phosphatidylcholine, LPE = lysophosphatidylethanolamine, PE = phosphatidylethanolamine, PG = phosphatidylglycerol, PS = phosphatidylserine, DG = diacylglycerol, and TG = triacylglycerol. FC = fold change.
